# Supplementary material for: From dots to tubes – the reversed scenario of bottom-up external-catalyst-free synthesis of N-doped carbon nanotubes
Source: Royal Society of Chemistry journal article supplement (doi:10.1039/d3cc01785k), 2023-01-01
Supplement: d3cc01785k1.pdf [file d3cc01785k1.pdf]

Electronic Supplementary Material (ESI) for Chemical Communications.

This journal is © The Royal Society of Chemistry 2023

## Electronic Supplementary Information (ESI)

*for*

### **From dots to tubes – the reversed scenario as bottom-up external-catalyst-free synthesis of *N*-doped carbon nanotubes**

Anna Kolanowska,<sup>a,b,\*</sup> Dariusz Łukowiec<sup>c</sup>, Maciej Krzywiecki<sup>d</sup>, Joanna Bok-Badura<sup>e</sup> and Sławomir Boncel<sup>a,f,\*</sup>

Silesian University of Technology, Gliwice, Poland

\*E-mail: [anna.kolanowska@polsl.pl](mailto:anna.kolanowska@polsl.pl), [slawomir.boncel@polsl.pl](mailto:slawomir.boncel@polsl.pl)

<sup>a</sup> *NanoCarbon Group*, Faculty of Chemistry, Department of Organic Chemistry, Bioorganic Chemistry and Biotechnology, Silesian University of Technology, Krzywoustego 4, 44-100 Gliwice, Poland.

<sup>b</sup> Biotechnology Centre, Silesian University of Technology, Bolesława Krzywoustego 8, 44-100 Gliwice, Poland.

<sup>c</sup> Materials Research Laboratory, Faculty of Mechanical Engineering, Silesian University of Technology, Konarskiego 18A, 44-100 Gliwice, Poland.

<sup>d</sup> Institute of Physics–CSE, Silesian University of Technology, Stanisława Konarskiego 22B, 44-100 Gliwice, Poland.

<sup>e</sup> Faculty of Chemistry, Department of Inorganic, Analytical Chemistry and Electrochemistry, Silesian University of Technology, Krzywoustego 6, 44-100 Gliwice, Poland.

<sup>f</sup> Centre for Organic and Nanohybrid Electronics (CONE), Silesian University of Technology, Konarskiego 22B, 44-100 Gliwice, Poland

**Table S1** Summary of the external-catalyst-free methods of the (*N*-)CNT synthesis.

| CNT product                       | CNT properties              | Procedure/<br>conditions<br>/substrates                                          | Temperature<br>(°C) | Time<br>(min) | Carrier<br>gas/dopant                                     | Carbon<br>source                                                                                       | Ref.   |
|-----------------------------------|-----------------------------|----------------------------------------------------------------------------------|---------------------|---------------|-----------------------------------------------------------|--------------------------------------------------------------------------------------------------------|--------|
| <i>N</i> -doped SWCNTs (3.6 at.%) | d=1.29-1.65 nm              | CVD                                                                              | 900                 | 1-20          | Ar/H <sub>2</sub> /NH <sub>3</sub><br>1000/100/50<br>sccm | CH <sub>4</sub> , 100<br>sccm                                                                          | 1      |
| MWCNTs                            | d=50-100 nm<br>l=0.6-1.6 μm | Microwave-<br>induced pyrolysis                                                  | 500                 | 30            | N <sub>2</sub> 100 sccm                                   | Gumwood                                                                                                | 2      |
| MWCNTs                            | d=50.3-66.1 nm              | CVD, KOH-assisted                                                                | 480                 | 40            | N <sub>2</sub> 150 sccm                                   | C <sub>2</sub> H <sub>2</sub> :CO <sub>2</sub><br>(1:1)<br>80 sccm                                     | 3      |
| SWCNTs                            | d=1-2 nm                    | CVD, nanosized<br>diamond                                                        | 850                 | 30            | Ar, H <sub>2</sub> 50 sccm                                | Ethanol                                                                                                | 4      |
| MWCNTs                            | -                           | CVD, Ge NPs                                                                      | 750                 | 20            | Ar                                                        | C <sub>2</sub> H <sub>2</sub>                                                                          | 5      |
| SWCNTs                            | d=0.6-2.5 nm                | CVD, Ge<br>nanocrystals                                                          | 850-1000            | 20            | H <sub>2</sub> 300 sccm                                   | CH <sub>4</sub> 1000<br>sccm                                                                           | 6      |
| MWCNTs                            | d=15-50 nm                  | Plasma enhanced<br>CVD                                                           | 850                 | 3-5           | N <sub>2</sub>                                            | CH <sub>4</sub>                                                                                        | 7      |
| MWCNTs                            | d=20-80 nm                  | CVD on carbon<br>black                                                           | 800                 | 30            | Ar 120 sccm                                               | C <sub>2</sub> H <sub>4</sub> 40<br>sccm                                                               | 8      |
| MWCNTs                            | d=20-90 nm                  | CVD on graphite                                                                  | 850                 | 30            | He 36 sccm                                                | C <sub>2</sub> H <sub>4</sub> 4<br>sccm                                                                | 9      |
| SWCNTs                            | d=1.2-1.6 nm                | CVD on carbon-<br>implanted SiGe                                                 | 850                 | 10            | Ar, H <sub>2</sub> 300 sccm                               | CH <sub>4</sub> 1000<br>sccm                                                                           | 10     |
| SWCNTs                            | d=1.7 nm                    | CVD, ZnO NPs                                                                     | 900                 | 20            | H <sub>2</sub> 300 sccm                                   | Ethanol                                                                                                | 11     |
| SWCNTs                            | d<2 nm                      | CVD, SiO <sub>2</sub> or TiO <sub>2</sub><br>NPs                                 | 900                 | 10            | H <sub>2</sub> 800 or 200<br>sccm, Ar 200 sccm            | CH <sub>4</sub> 200<br>sccm or<br>ethanol                                                              | 12     |
| SWCNTs                            | d<2 nm                      | CVD, Te NPs                                                                      | 900                 | 10            | H <sub>2</sub> 200 sccm, Ar<br>800 sccm                   | Ethanol                                                                                                | 13     |
| SWCNTs                            | -                           | CVD, SiO <sub>2</sub>                                                            | 900                 | 20            | H <sub>2</sub> 500 sccm, Ar<br>100 sccm                   | CH <sub>4</sub> 500<br>sccm                                                                            | 14     |
| MWCNTs                            | -                           | CVD, CaSiO <sub>3</sub> -<br>coated graphite                                     | 1200-1400           | 60            | Ar 50 sccm                                                | Ethanol                                                                                                | 15     |
| MWCNTs                            | d<20 nm                     | CVD, bamboo<br>charcoal                                                          | 1200-1500           | 60            | Ar 50 sccm                                                | Ethanol                                                                                                | 16     |
| MWCNTs                            | d=20 nm<br>l=0.4-9 μm       | Microwave<br>plasma enhanced<br>CVD, amorphous<br>carbon coated<br>corning glass | 600                 | 5-30          | H <sub>2</sub> 80 sccm                                    | CH <sub>4</sub> 10<br>sccm                                                                             | 17     |
| SWCNTs                            | d<2 nm                      | CVD, C <sub>60</sub>                                                             | 950                 | 15            | Ar 1000 sccm                                              | ethanol                                                                                                | 18     |
| MWCNTs                            | d=40-80 nm                  | CVD, carbon black                                                                | 750-1000            | 30            | Ar 90 sccm                                                | C <sub>2</sub> H <sub>2</sub> , C <sub>2</sub> H <sub>4</sub> ,<br>cyclohexan<br>e, ethanol<br>10 sccm | 19     |
| MWCNTs                            | d=13-16 nm                  | CVD, Si NPs                                                                      | 850                 | 30            | H <sub>2</sub> 2000 sccm                                  | ethanol                                                                                                | 20     |
| SWCNTs                            | -                           | CVD, Si/SiO <sub>2</sub><br>wafers                                               | 900                 | 20            | H <sub>2</sub> 500 sccm                                   | CH <sub>4</sub> 500<br>sccm                                                                            | 21     |
| SWCNTs                            | d=0.8-1.8 nm                | CVD, Al <sub>2</sub> O <sub>3</sub><br>ceramic NPs                               | 800-850             | 30            | Ar/H <sub>2</sub> 300 sccm                                | Ethanol<br>50 sccm                                                                                     | 22     |
| MWCNTs                            | d=100 nm<br>l=10 μm         | Plasma assisted<br>CVD                                                           | 1727-5727           | 30            | Ar 5000 sccm<br>H <sub>2</sub> 2000 sccm                  | Graphite<br>rod                                                                                        | 23     |
| SWCNTs                            | d=1.0-1.8 nm                | CVD, SiO <sub>2</sub>                                                            | 850                 | 30            | Ar/H <sub>2</sub> 70 sccm                                 | Ethanol                                                                                                | 24     |
| SWCNTs                            | d=1.0-3.0 nm                | CVD, diamond<br>NPs and<br>fullerenes                                            | -                   | -             | Ar                                                        | CH <sub>4</sub>                                                                                        | 25     |
| SWCNTs                            | d=0.9 nm<br>l=17-52 μm      | CVD, (7,6) and<br>(6,5) SWCNTs                                                   | 900                 | 15            | H <sub>2</sub> 300 sccm<br>Ar 160 sccm                    | Ethanol or<br>CH <sub>4</sub> 2000<br>sccm                                                             | 26     |
| SWCNTs                            | d=0.7-1.5 nm                | CVD, (F-)fullerene                                                               | 900                 | 20            | H <sub>2</sub> , Ar                                       | Ethanol                                                                                                | 27, 28 |
| SWCNTs                            | d=0.85 nm                   | CVD, fullerene<br>caps                                                           | 900                 | 20            | Ar, H <sub>2</sub> 50 sccm                                | Ethanol                                                                                                | 29     |
| MWCNTs                            | d=50-100 nm<br>l=0.6-1.8 μm | Microwave<br>pyrolysis                                                           | 600-1400            | 30            | N <sub>2</sub> 400 sccm                                   | Cellulose                                                                                              | 30     |

d – diameter, l – length, NPs – nanoparticles

### Synthesis of amino-acid-CDs

Citric acid (1.5 mmol) and amino-acid (aspartic acid Asp, cysteine Cys, glycine Gly, histidine His, lysine Lys, and phenylalanine Phe) (1.5 mmol) were dissolved in distilled water (10 mL). The solution was heated in a Teflon<sup>®</sup>-coated autoclave at 180 °C for 24 h in a laboratory dryer. The autoclave was allowed to cool down to room temperature, and the post-reaction mixture was centrifuged at 5,500 rpm for 15 min. The resulting supernatant was filtered through a 0.22 μm-syringe filter (Minisart NY hydrophilic polyamide, 25 mm), and the filtrate was lyophilized (lyophilizer Martin Christ Alpha 2-4 LSCplus) to yield from yellow to dark-yellow solids.

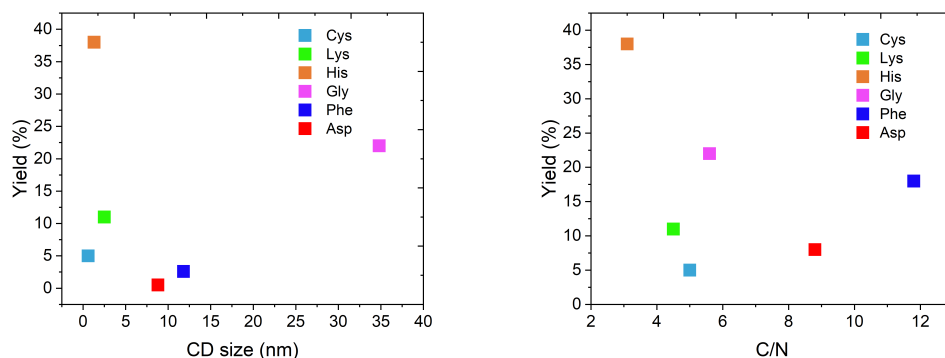

**Fig. S1** The effect of: CD size (*left*), and the C/N ratio (*right*) on yield of the CD-*N*-CNT synthesis.

a)

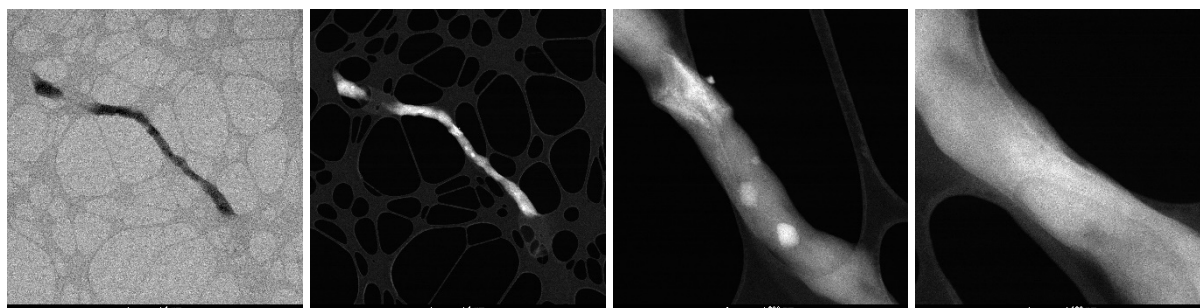

b)

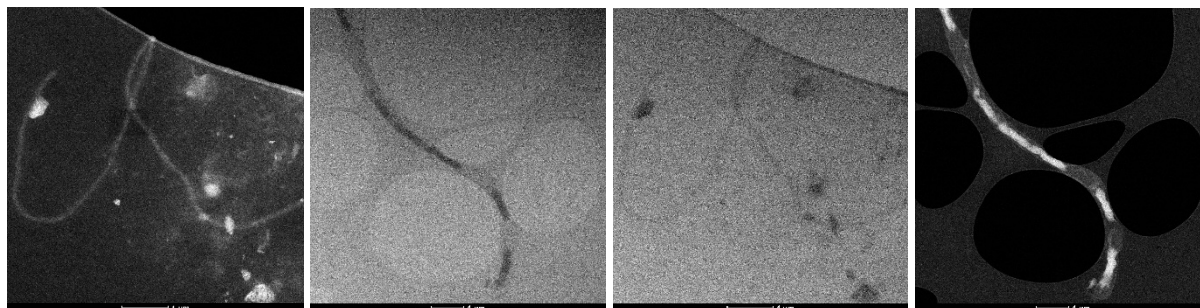

c)

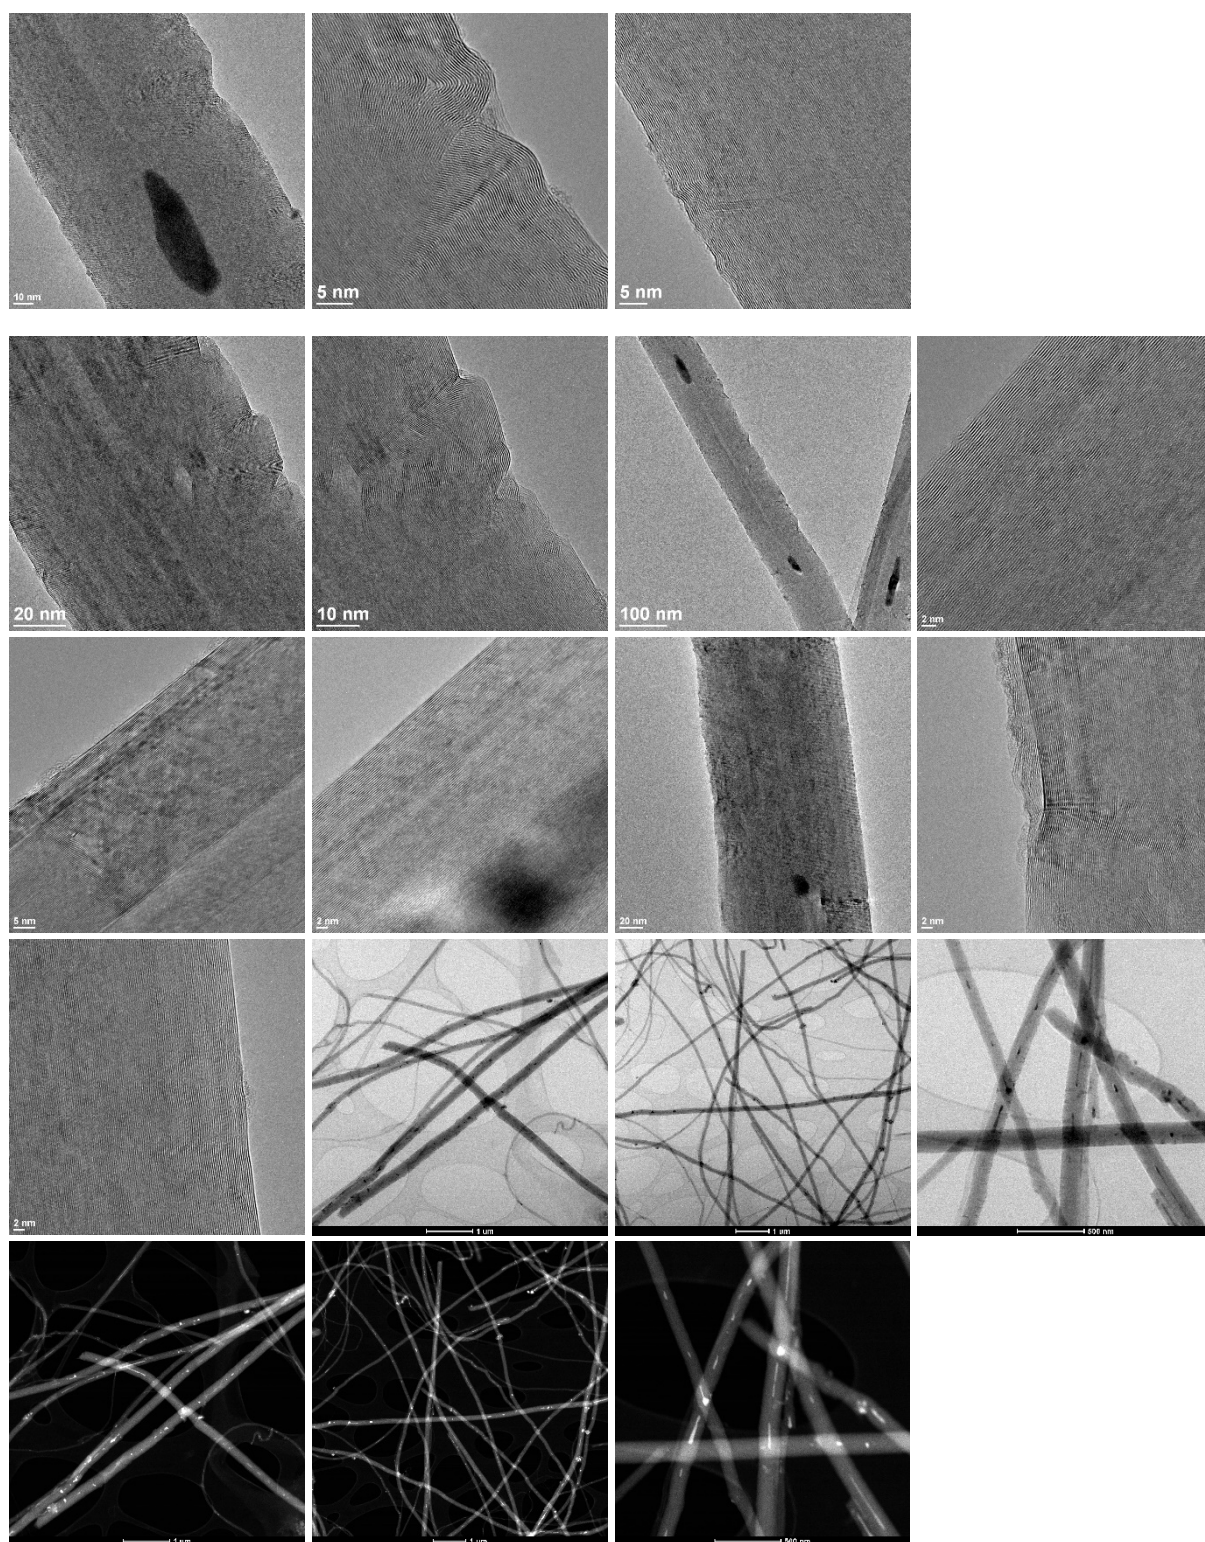

**Fig. S2** A selection of bright- and dark-field TEM images of the as-synthesized: (a) His-, (b) Asp-, and (c) Phe-CD-N-CNTs.

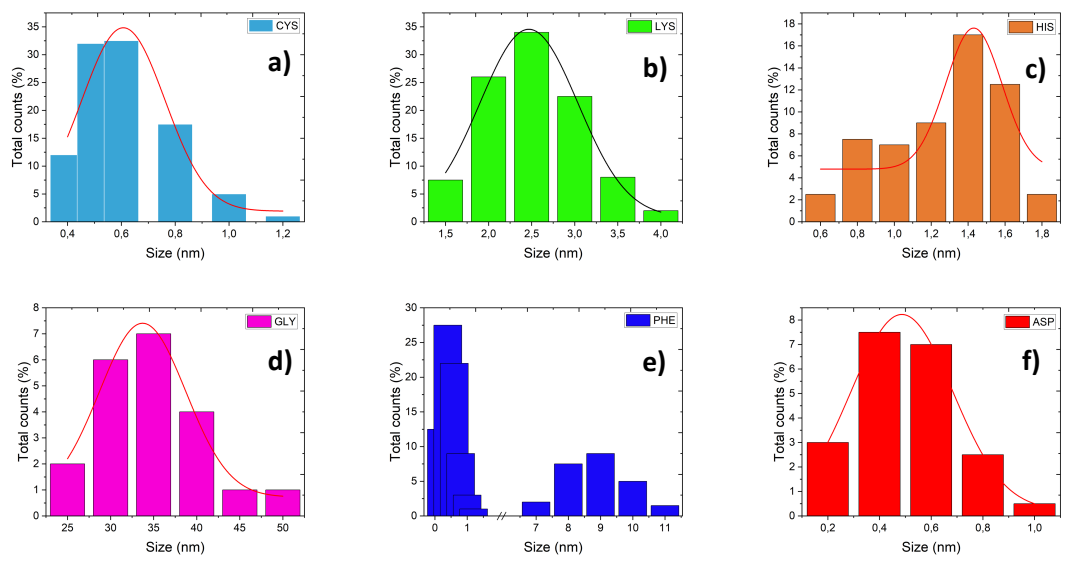

**Fig. S3** DLS data of the CD volume–size distribution in the aqueous suspension under neutral pH for Cys- (a), Lys- (b), His- (c), Gly- (d), Phe- (e), and Asp-CDs (f).

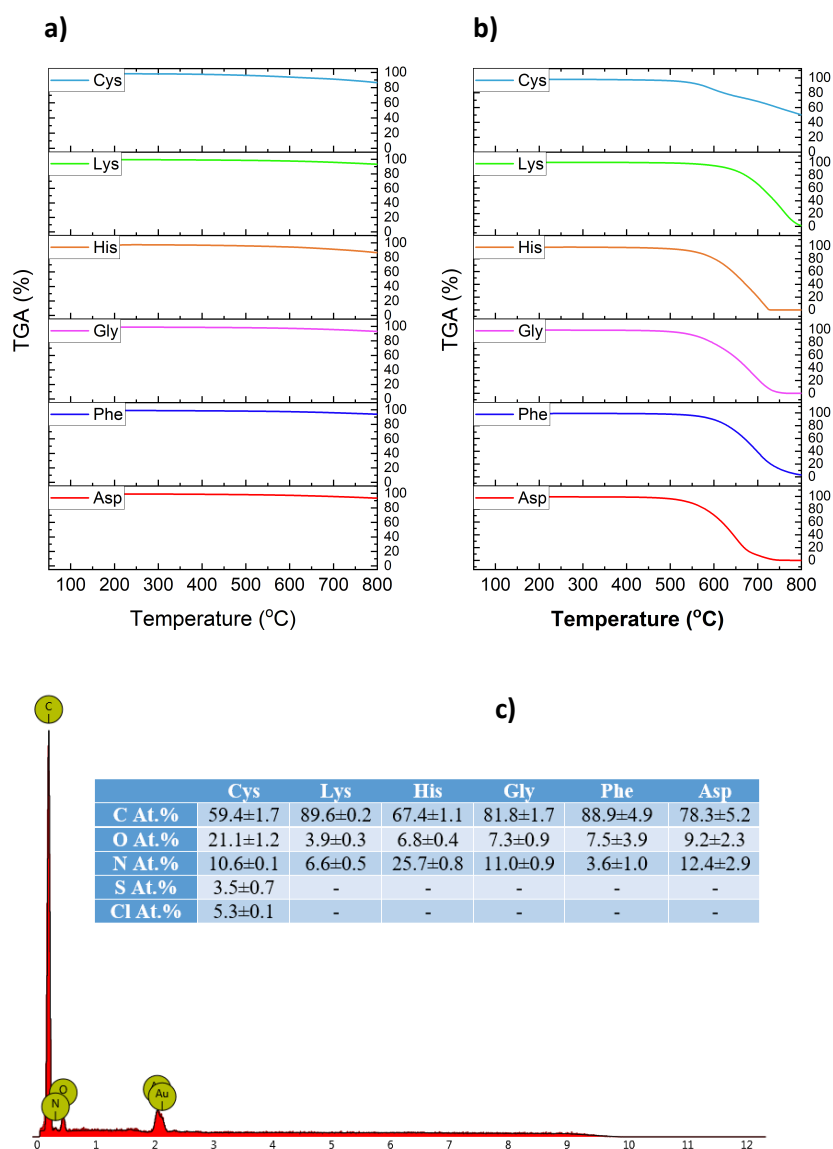

**Fig. S4** As-synthesized amino-acid-CD-*N*-CNTs: TGA profiles under nitrogen (a) versus air atmosphere (b), and EDX analysis (at. %) (c).

**Table S2** Raman peak intensity ratio  $I_D/I_G$ , main peak positions, and therefrom calculated  $L_a$ -values for amino acid-CD-*N*-CNTs.

|                                      | Cys-CD- <i>N</i> -CNTs | Lys-CD- <i>N</i> -CNTs | His-CD- <i>N</i> -CNTs | Gly-CD- <i>N</i> -CNTs | Phe-CD- <i>N</i> -CNTs | Asp-CD- <i>N</i> -CNTs |
|--------------------------------------|------------------------|------------------------|------------------------|------------------------|------------------------|------------------------|
| $I_D/I_G$ ratio                      | 1.14                   | 1.12                   | 0.99                   | 1.03                   | 1.07                   | 1.10                   |
| D-band position ( $\text{cm}^{-1}$ ) | 1346                   | 1347                   | 1363                   | 1362                   | 1346                   | 1351                   |
| G-band position ( $\text{cm}^{-1}$ ) | 1574                   | 1577                   | 1566                   | 1588                   | 1582                   | 1585                   |
| $L_a$ (nm)                           | 34                     | 34                     | 39                     | 37                     | 36                     | 35                     |

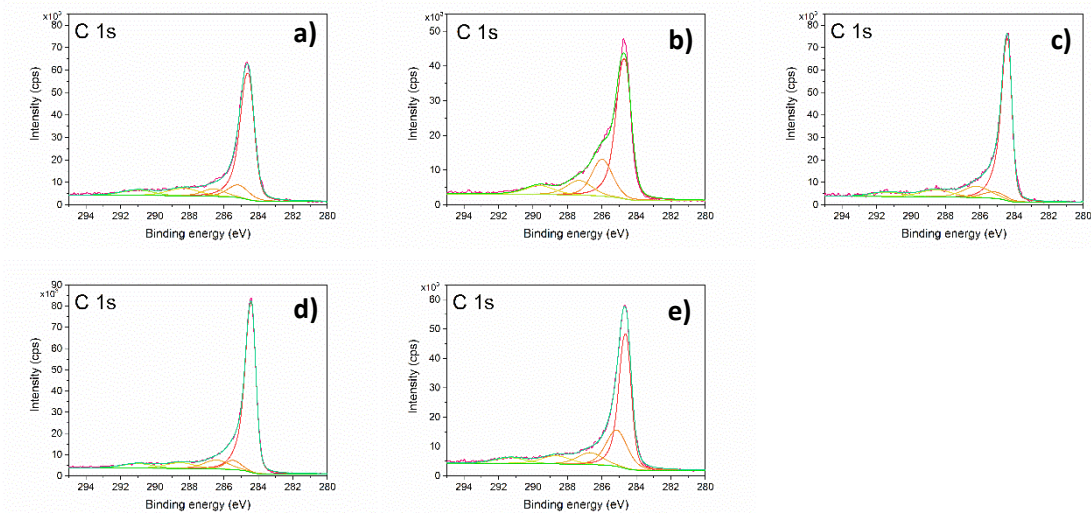

**Fig. S5** XPS in the C 1s BE region for Cys- (a), Lys- (b), His- (c), Gly- (d), and Asp-CD-N-CNTs (e).

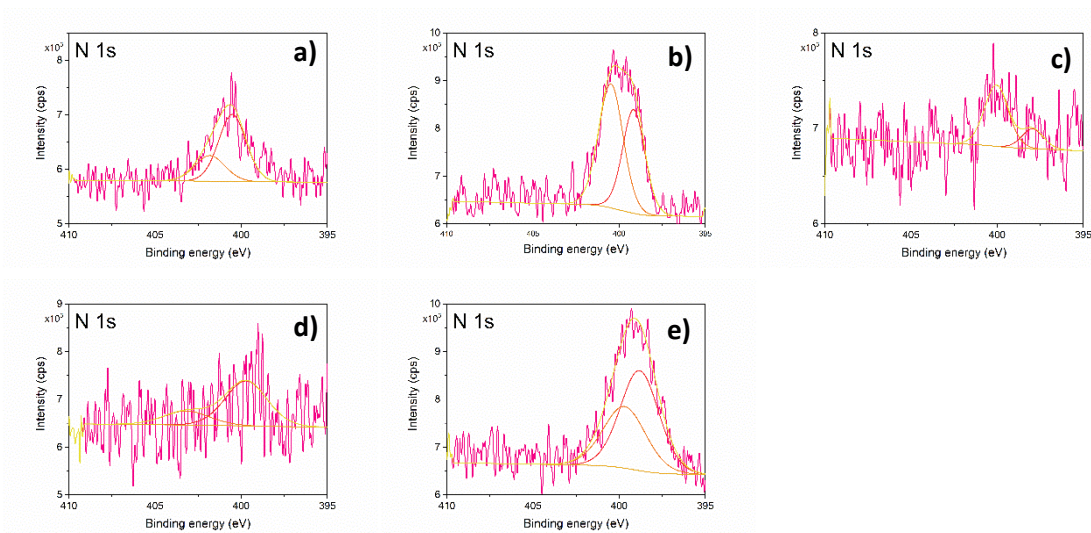

**Fig. S6** XPS in the N 1s BE region for Cys- (a), Lys- (b), His- (c), Gly- (d), and Asp-CD-N-CNTs (e).

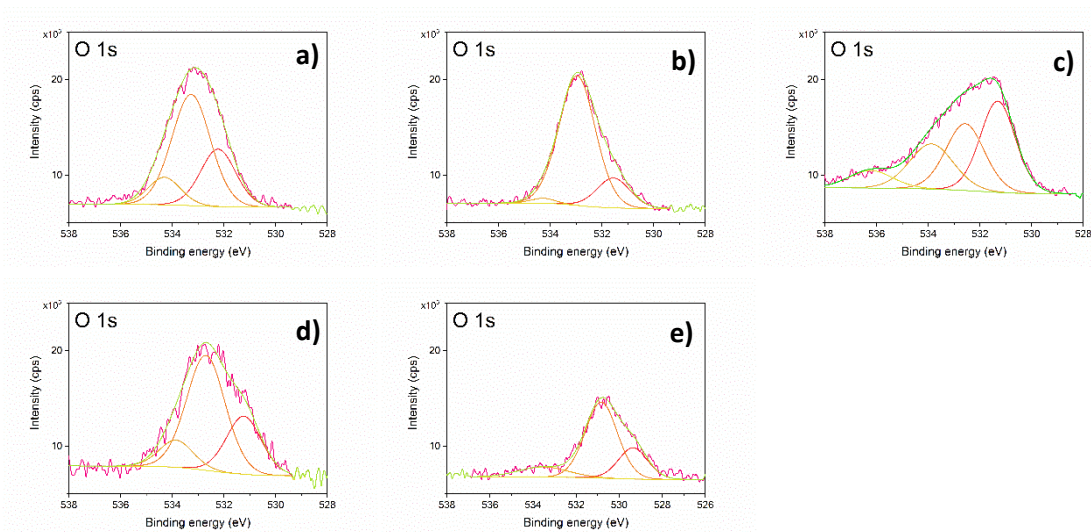

**Fig. S7** XPS in the O 1s BE region for Cys- (a), Lys- (b), His- (c), Gly- (d), and Asp-CD-N-CNTs (e).

**Table S3** Inorganic contaminants in the Phe-CD-*N*-CNTs sample determined using inductively coupled plasma atomic emission spectrometry (ICP-AES).

| Sample                 | Al mg/l                 | Ca mg/l                 | Fe mg/l                 | K mg/l                 | Mg mg/l                 | Mn mg/l                 | Na mg/l                 | Pb mg/l                 | Zn mg/l                 | Co mg/l                 | Cu mg/l                 | Ni mg/l                 |
|------------------------|-------------------------|-------------------------|-------------------------|------------------------|-------------------------|-------------------------|-------------------------|-------------------------|-------------------------|-------------------------|-------------------------|-------------------------|
| Blank                  | 1.06                    | 4.25                    | 1.14                    | 0.66                   | 0,60                    | <0.1                    | 3.29                    | 4.09                    | <0.1                    | <0.1                    | <0.1                    | <0.1                    |
| Phe-CD- <i>N</i> -CNTs | 1.20                    | 1.00                    | 2.11                    | 0.10                   | <0.1                    | <0.1                    | 1.78                    | 10.35                   | <0.1                    | <0.1                    | <0.1                    | <0.1                    |
|                        | Al mg/mg <i>N</i> -CNTs | Ca mg/mg <i>N</i> -CNTs | Fe mg/mg <i>N</i> -CNTs | K mg/mg <i>N</i> -CNTs | Mg mg/mg <i>N</i> -CNTs | Mn mg/mg <i>N</i> -CNTs | Na mg/mg <i>N</i> -CNTs | Pb mg/mg <i>N</i> -CNTs | Zn mg/mg <i>N</i> -CNTs | Co mg/mg <i>N</i> -CNTs | Cu mg/mg <i>N</i> -CNTs | Ni mg/mg <i>N</i> -CNTs |
| Phe-CD- <i>N</i> -CNTs | 0.001197                | 0.001004                | 0.002111                | 9.54E-05               | 0.0001                  | 0.0001                  | 0.001785                | 0.01035                 | 0.0001                  | 0.0001                  | 0.0001                  | 0.0001                  |

### Preparation of the electroconductive CNT paints

Three types of CNTs: Nanocyl NC7000™, in-house synthesized ultralong MWCNTs, and Phe-CD-*N*-CNTs were dispersed in water in the presence of SDS surfactant using ultrasonication (Bandelin Sonorex RK 106, 35 kHz, 480 W) for 15 min. Next, SX-150 (screen printing base) was added. The paints were mixed for 15 min (PARKSIDE® PFBS 160 B2, 10000 rpm) and were further applied on cotton textiles at different layer thickness (50, 100, 150, 200 and 250 μm) – controlled by paint applicator Erichsen (type BIRD, model 284) – on the length of conductive path equal to 7 cm and 1.5 cm in width. Composition of the paints are listed below (Table S3). Surface electric resistances (Ω/sq) of the paths were measured using the voltage method in a custom-designed voltage measurement system.<sup>31</sup>

**Table S4** Electroconductive CNT-based paints composition.

| CNT type               | CNT amount (g) | Water content (g) | SX-150 content (g) | SDS (g) | CNT content (%) | Textile weight (g) | Textile weight after coating (g) |
|------------------------|----------------|-------------------|--------------------|---------|-----------------|--------------------|----------------------------------|
| Nanocyl NC7000™ MWCNTs | 0.1022         | 1.013             | 0.9134             | 0.0010  | 10              | 0.5042             | 0.6247                           |
| In-house MWCNTs        | 0.1000         | 10.066            | 9.150              | 0.0010  | 1               | 0.5334             | 0.6048                           |
| Phe-CD- <i>N</i> -CNTs | 0.1002         | 10.327            | 9.180              | 0.0011  | 1               | 0.4849             | 0.5946                           |

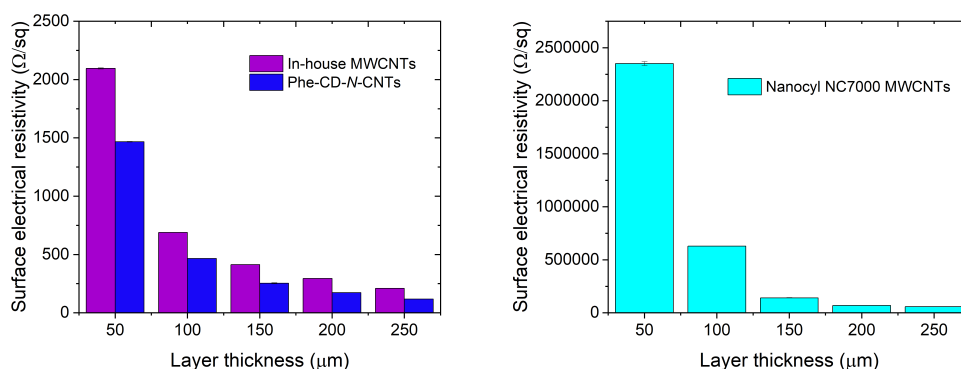

**Fig. S8** Effect of coating thickness on surface electrical resistivity of Phe-CD-*N*-CNTs (navy blue), in-house MWCNTs (purple) and Nanocyl NC7000™ (turquoise) coatings on cotton.



## References

1. D. Yu, Q. Zhang and L. Dai, *J Am Chem Soc Comm*, 2010, **132**, 15127-15129.
2. K. Shi, J. Yan, E. Lester and T. Wu, *Ind Eng Chem Res*, 2014, **53**, 15012-15019.
3. B.A. Tarboush, F.S. Mjalli, M.A. Alsaadi and M.M. Aljumaily, *Physica B Condens*, 2021, **621**, 413294.
4. D. Takagi, Y. Kobayashi and Y. Homma, *J Am Chem Soc*, 2009, **131**, 6922-6923.
5. A. Capasso, E. Waclawik, J.M. Bell, S. Ruffell, A. Sgarlata, M. Scarselli, M. De Crescenzi and N. Motta, *J Non Cryst Solids*, 2010, **356**, 1972-1975.
6. T. Uchino, G.N. Ayre, D.C. Smith, J.L. Hutchion, C.H. de Groot and P. Ashburn, *J Electrochem Soc*, 2009, **156**, K144-K148.
7. S. Kumar, I. Levchenko, K. Ostrikov and J.A. McLaughlin, *Carbon*, 2012, **50**, 325-329.
8. J.-H. Lin, C.-S. Chen, H.-L. Ma, C.-W. Chang, C.-Y. Hsu and H.-W. Chen, *Carbon*, 2008, **46**, 1619-1623.
9. J.H. Lin, C.S. Chen, M.H. Rummeli, A. Bachmatiuk, Z.Y. Zeng, H.L. Ma, B. Buchner and H.W. Chen, *Chem Mater*, 2011, **23**, 1637-1639.
10. T. Uchino, K.N. Bourdakos, C.H. de Groot, P. Ashburn, M.E. Kiziroglou, G.D. Dilliway and D.C. Smith, *Appl Phys Lett*, 2005, **86**, 233110.
11. F. Gao, L. Zhang and S. Huang, *Appl Surf Sci*, 2010, **256**, 2323-2326.
12. S. Huang, Q. Cai, J. Chen, Y. Qian and L. Zhang, *J Am Chem Soc*, 2009, **131**, 2094-2095.
13. Y. Qian, S. Huang, Y. Bai, J. Chen, L. Zhang, W. Guang and S. Wang, *Chem Vap Deposition*, 2010, **16**, 136-142.
14. B. Liu, W. Ren, L. Gao, S. Li, S. Pei, C. Liu, C. Jiang and H.-M. Cheng, *J Am Chem Soc*, 2009, **131**, 2082-2083.
15. J. Zhu, J. Jia, F.-L. Kwong, D.H.L. Ng and P.A. Crozier, *Carbon*, 2012, **50**, 2666-2669.
16. J. Zhu, J. Jia, F.L. Kwong, D.H.L. Ng and S.C. Tjong, *Biomass Bioenergy*, 2012, **36**, 12-19.
17. J.K. Seo, H. Jung, J.-H. Lee, S.Y. Deok, J.J. Young and W.S. Choi, *Curr Appl Phys*, 2010, **10**, S447-S450.
18. Y. Sun, R. Kitaura, J. Zhang, Y. Miyata and H. Shinohara, *Carbon*, 2014, **68**, 80-86.
19. Z.-Y. Zeng and J.-H. Lin, *RSC Adv*, 2014, **4**, 40251-40258.
20. X. Xu, S. Huang, Y. Hu, J. Lu and Z. Yang, *Mater Chem Phys*, 2012, **133**, 95-102.
21. B. Liu, D.M. Tan, C.H. Sun, C.H. Liu, C. Liu, W.C. Ren, F. Li, W.J. Yu, L.C. Yin, L.L. Zhang, C.B. Jiang and H. M. Cheng, *J Am Chem Soc*, 2011, **133**, 197-199.
22. H. Liu, D. Takagi, H. Ohno, S. Chiashi, T. Chokan and Y. Homma, *Appl Phys Express*, 2008, **1**, 014001.
23. A. Koshio, M. Yudasaka and S. Iijima, *Chem Phys Lett*, 2002, **356**, 595-600.
24. H. Liu, D. Takagi, S. Chiashi and Y. Homma, *Carbon*, 2010, **48**, 114-122.
25. F. Rao, T. Li and Y. Wang, *Carbon*, 2009, **47**, 3580-3584.
26. J. Liu, C. Wang, X. Tu, B. Liu, L. Chen, M. Zheng and C. Zhou, *Nat Commun*, 2012, **3**, 1199.
27. I. Ibrahim, Y. Zhang, A. Popov, L. Dunsch, B. Buchner, G. Cuniberti and M.H. Rummeli, *Nanoscale Res Lett*, 2013, **8**, 265.
28. I. Ibrahim, A. Bachmatiuk, M.H. Rummeli, U. Wolff, A. Popov, O. Boltalina, B. Buchner and G. Cuniberti, *Phys Status Solidi B*, 2011, **248**, 2467-2470.
29. X. Yu, J. Zhang, W. Choi, J.-Y. Choi, J.M. Kim, L. Gan and Z. Liu, *Nano Lett*, 2010, **10**, 3343-3349.
30. J.E. Omoriyekomwan, A. Tahmasebi, J. Zhang and J. Yu, *Nanomaterials*, 2022, **12**, 737.
31. A. Kolanowska, A.W. Kuziel, A.P. Herman, R.G. Jedrysiak, T. Gizewski and S. Boncel, *Prog Org Coat*, 2019, **130**, 260-269.
